# Supplementary material for: Smad3 Mediates Diabetic Dyslipidemia and Fatty Liver in db/db Mice by Targeting PPARδ
Source: MDPI journal article supplement (doi:10.3390/ijms241411396), 2023-07-13
Supplement: s1 [file s1]

## Supplementary Figures

**A**

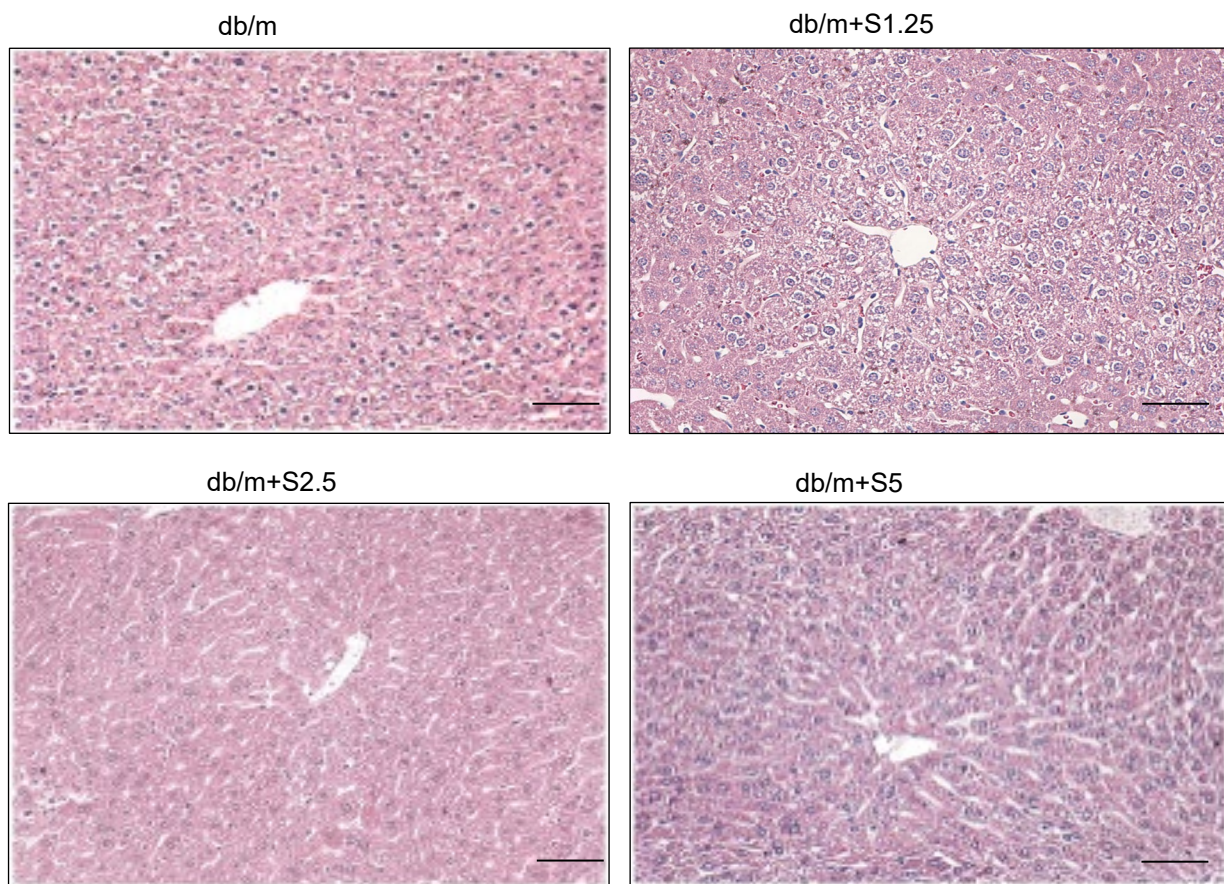

# B

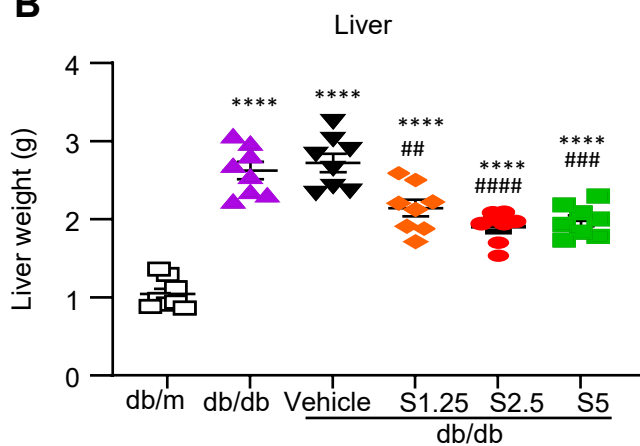

**C**

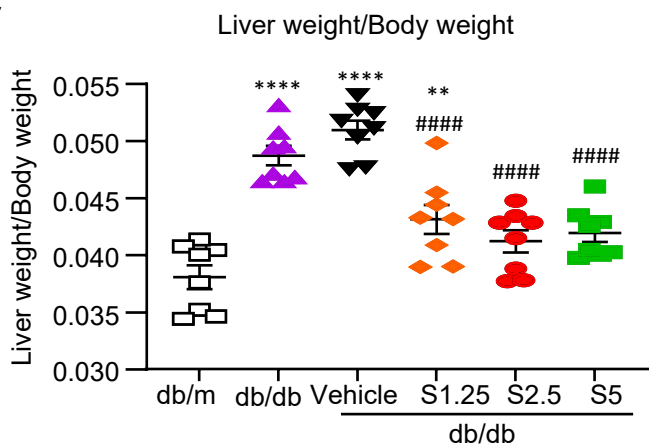

**Figure S1. SIS3 treatment inhibits liver weight with an optimal dosage at 2.5 mg/kg without systemic toxicity in db/m and db/db mice. (A) H&E staining of liver tissues from db/m mice. (B) Liver weight. (C) Liver weight against body weight. Data represents the mean  $\pm$  SEM for at least 6 mice per group. \*\* $P$  < 0.01, \*\*\*\* $P$  < 0.0001 versus normal db/m mice. ## $P$  < 0.01, ### $P$  < 0.001, #### $P$  < 0.0001 compared with vehicle-treated db/db mice. Scale bar, 50  $\mu$ m. Dose dependent treatment of SIS3: S1.25=1.25 mg/kg.bw, S2.5=2.5 mg/kg.bw, S5=5 mg/kg.bw.**

A

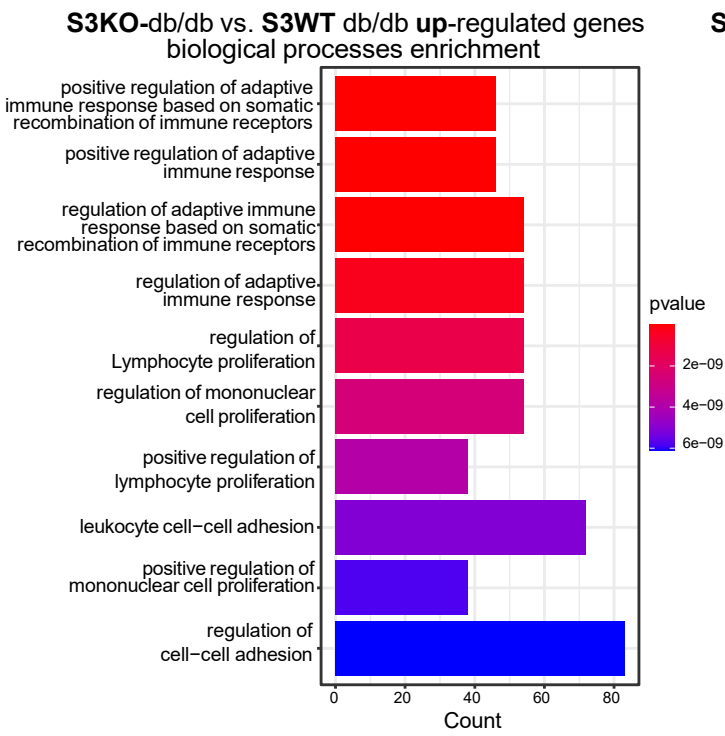

B

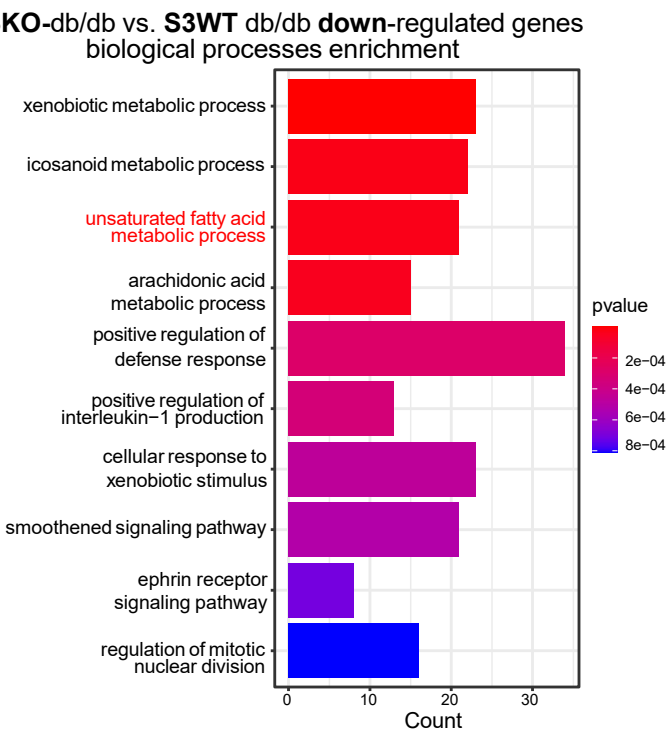

**Figure S2. Bioinformatic analysis of DEGs in livers by RNA-seq. (A-B)** The top 10 gene ontology (GO) biological process (BP) terms enrichment of upregulated and downregulated genes in livers of Smad3 KO-db/db relative to Smad3 WT-db/db mice showing that Smad3 KO-db/db downregulated genes are significantly enriched in unsaturated fatty acid metabolic process.

**A**

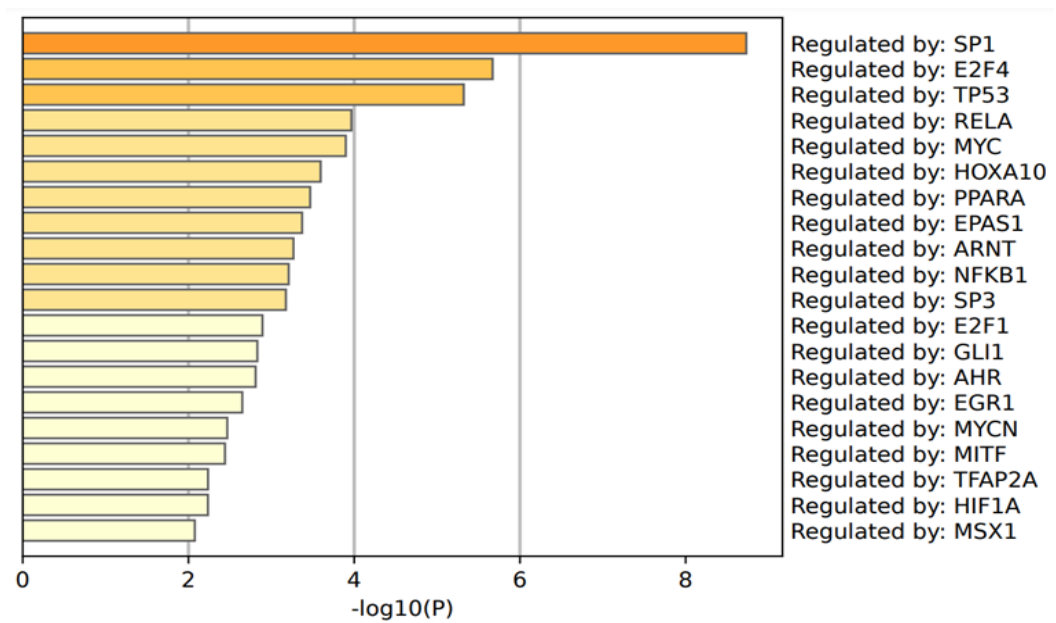

**B**

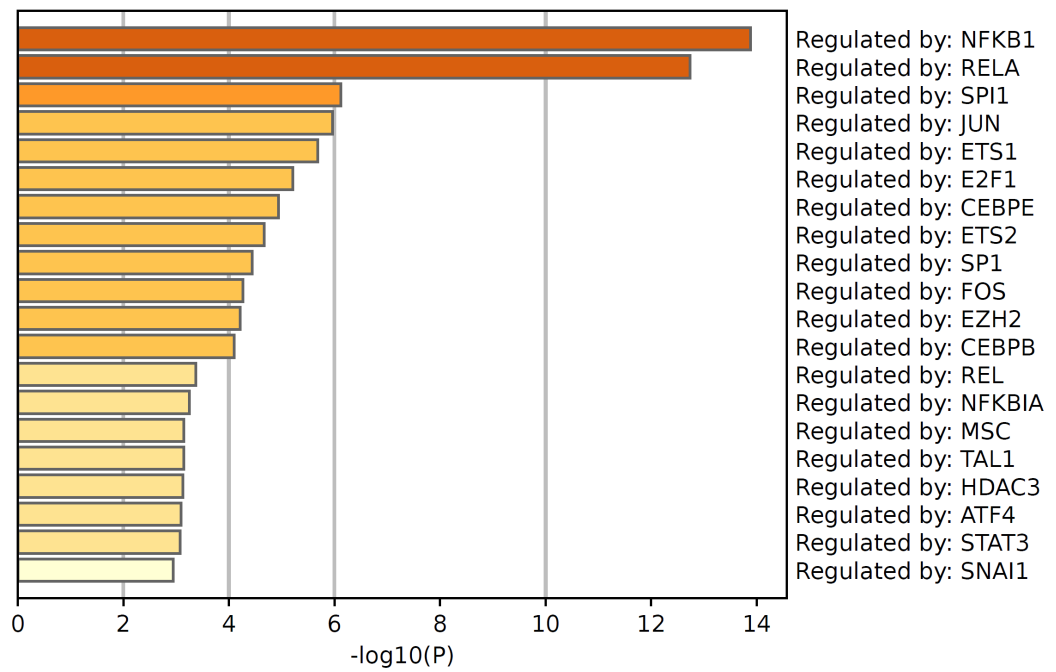

**Figure S3. TF-target enrichment was preformed based on the upregulated DEGs of Smad3-WT db/db mice or Smad3 KO db/db mice by Metascape. (A)** TF enrichment of upregulated DEGs of Smad3-WT db/db mice vs. Smad3-WT db/m. **(B)** TF enrichment of upregulated DEGs of Smad3-KO db/db vs Smad3-WT db/db mice.

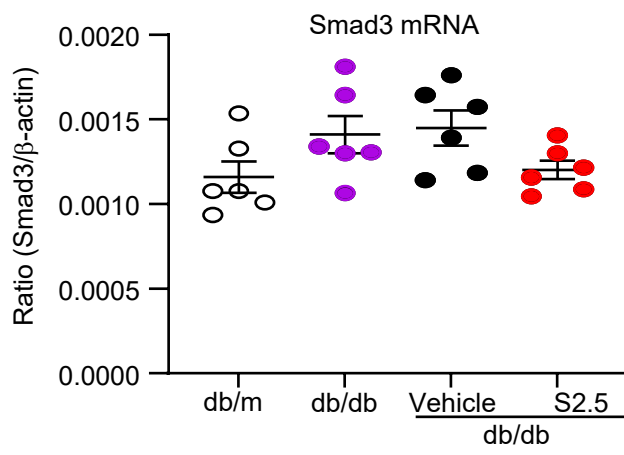

**Figure S4. Bioinformatic analysis of DEGs in livers by RNA-seq.** Liver Smad3 levels detected by real-time PCR. Data represents the mean  $\pm$  SEM for at least 6 mice per group. SIS3 treatment dose: S2.5=2.5 mg/kg.bw.
